# Supplementary material for: NKTR-255 is a polymer-conjugated IL-15 with unique mechanisms of action on T and natural killer cells
Source: JCI journal article supplement (doi:10.1172/jci144365), 2021-08-10
Supplement: sd1 [file 1]

Supplemental Figures

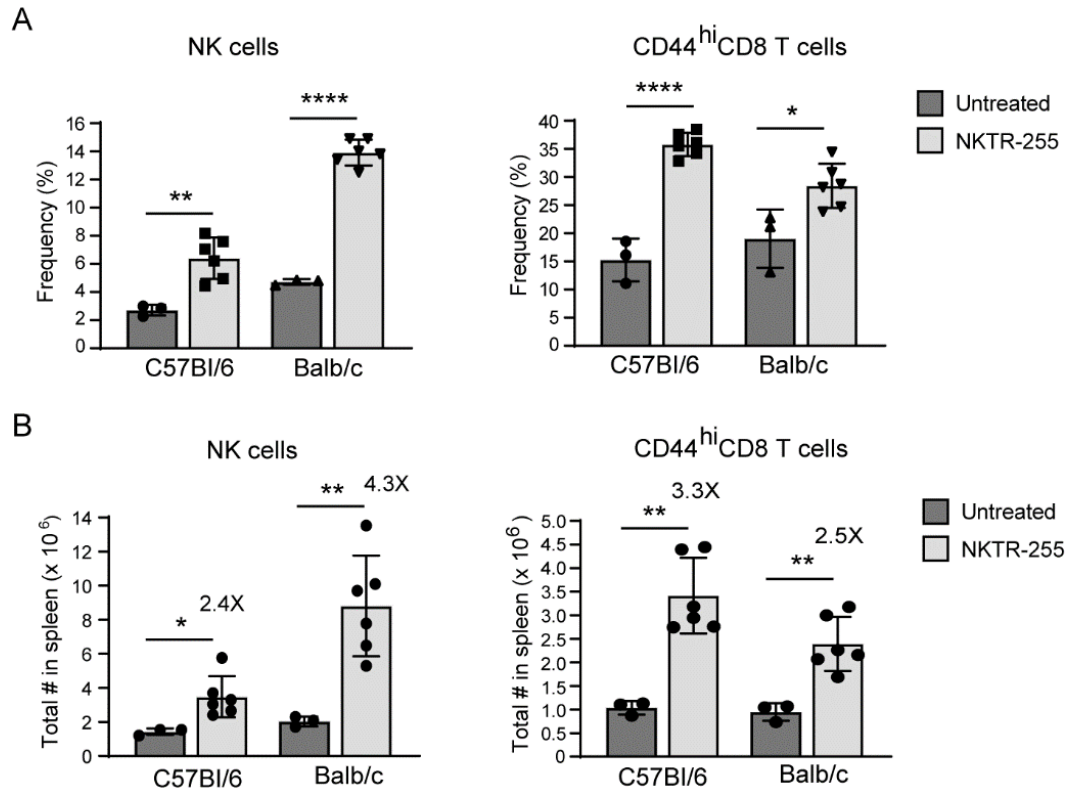

**Supplemental Figure 1. Responses to NKTR-255 in C57Bl/6 and Balb/c mice.** Age-matched female C57Bl/6 and Balb/c mice (n=3-6 mice/group) were treated with NKTR-255 (0.03 mg/kg, i.p.) or untreated, and lymphocyte populations in spleen were examined 6 days later. **(A)** Average frequency of splenic NK cells (NKp46+) and CD44<sup>hi</sup> CD8 T cells. **(B)** Total number of indicated cell populations in spleens. Numbers above bars represent relative fold increase in treated over untreated mice. Data are compiled from two experiments. \**P* < 0.05; \*\**P* < 0.01; \*\*\*\**P* < 0.0001, (calculated using the two-tailed Student's t test).

Supplemental Figure 2

A

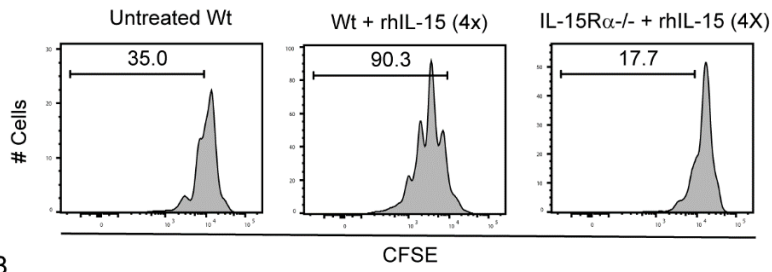

B

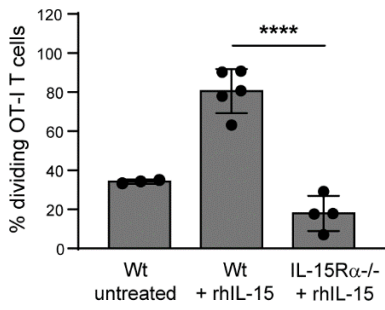

C

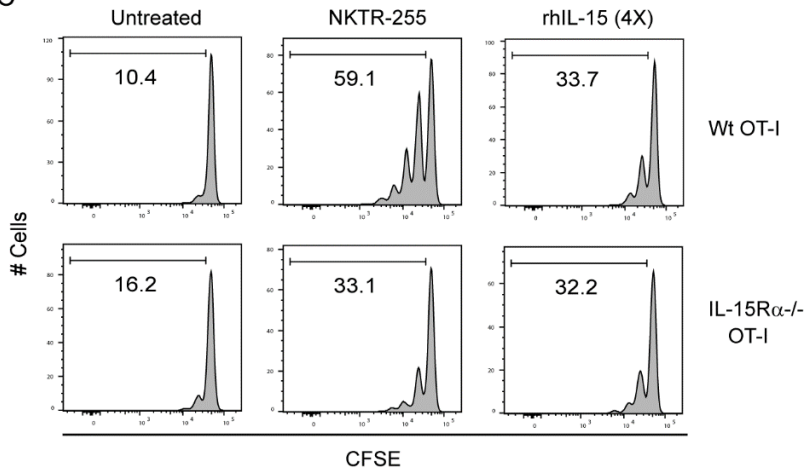

D

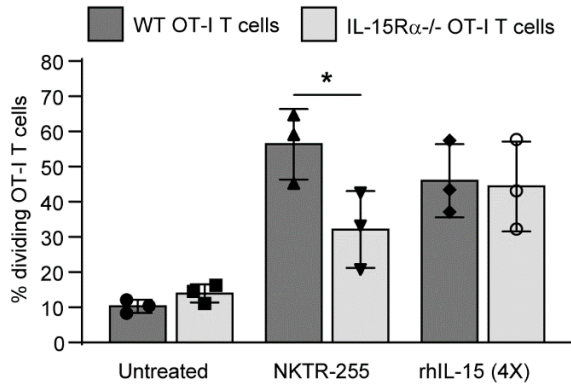

**Supplemental Figure 2. IL-15R $\alpha$ <sup>-/-</sup> and WT OT-I T cell response to NKTR-255 and rhIL-15.** (A, B) Naive OT-I cells from WT (CD45.1<sup>+</sup>) mice were CFSE-labeled and transferred into CD45.2<sup>+</sup> WT and IL-15R $\alpha$ <sup>-/-</sup> mice. One day later, mice (n=3–5 mice/group) were treated i.p. with four doses of rhIL-15 (5.0  $\mu$ g, every 2 days). Ten days post-treatment, CFSE dilution in CD45.1<sup>+</sup> OT-I cells in splenocytes was analyzed. (A) Representative CFSE intensity after gating on CD45.1<sup>+</sup> (WT) donor CD8 T cells. (B) Average percent of dividing OT-I cells from two experiments. (C, D) Naive OT-I cells from WT (CD45.1<sup>+</sup>) and IL-15R $\alpha$ <sup>-/-</sup> (CD45.1/CD45.2<sup>+</sup>) mice were mixed at a 1:1 ratio, CFSE-labeled, and transferred into CD45.2<sup>+</sup> WT mice. One day later, mice (n=3 mice/group) were treated i.p. with either one dose of NKTR-255 (0.03 mg/kg) or four doses of rhIL-15 (5.0  $\mu$ g, every 2 days). Nine days post-treatment, CFSE dilution in CD45.1<sup>+</sup> OT-I T cells in splenocytes was analyzed. (C) Representative CFSE intensity after gating on CD45.1<sup>+</sup> (WT) and CD45.1/CD45.2<sup>+</sup> (IL-15R $\alpha$ <sup>-/-</sup>) donor CD8 T cells isolated from the same mouse. (D) Average percent of dividing OT-I cells in one representative experiment. Similar results were obtained in two additional experiments. \**P* < 0.05; \*\*\*\**P* < 0.0001, (calculated using the two-tailed Student's t test); OT-I, ovalbumin-specific CD8 T cells; rhIL-15R $\alpha$ , recombinant human IL-15R $\alpha$ .

Supplemental Figure 3

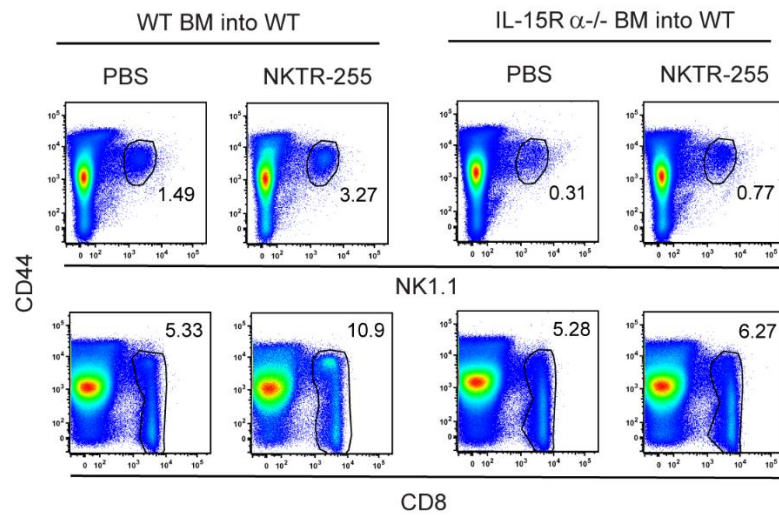

**Supplemental Figure 3. Frequency of NK cells and CD8 T cells in WT and IL-15R $\alpha^{-/-}$  BM chimeras.** Representative flow cytometric plots of splenocytes showing staining of NK1.1, CD8, and CD44 expression in PBS and NKTR-255-treated BM chimeras from the experiment depicted in Figure 6 (A and B).
